# Supplementary material for: Long-Term Antithrombotic Treatments Prescribed for Cardiovascular Diseases in Patients with Hemophilia: Results from the French Registry
Source: PubMed Central journal article supplement — Thromb Haemost. 2020 Oct 24;121(3):287–96. doi: 10.1055/s-0040-1718410 (PMC7895544; doi:10.1055/s-0040-1718410), 2020-10-24
Supplement: 10-1055-s-0040-1718410-s190349.pdf [file 10-1055-s-0040-1718410-s190349.pdf]

**Supplementary Table S1** Description of patients receiving a dual-pathway treatment and a tritherapy

|                        | Hemophilia type | Hemophilia severity (FVIII/FIX %) | Age (y) | Cardiovascular disease | Antithrombotic type | Months of DPT/TT treatment | CHA <sub>2</sub> DS <sub>2</sub> -VAsc | HAS-BLED | Prophylaxis | Number of major bleeding events | Change for another antithrombotic drug? |
|------------------------|-----------------|-----------------------------------|---------|------------------------|---------------------|----------------------------|----------------------------------------|----------|-------------|---------------------------------|-----------------------------------------|
| Dual-pathway treatment | A               | Mild (10%)                        | 77      | AF                     | ASA + VKA           | 18                         | 4                                      | 4        | No          | 2                               | No                                      |
|                        | A               | Mild (18%)                        | 65      | AF                     | ASA + VKA           | 24                         | 3                                      | 1        | No          | 1                               | No                                      |
| Tritherapy             | A               | Mild (20%)                        | 60      | ACS + AF               | ASA + CLOPI + VKA   | 6                          | 2                                      | 1        | No          | 1                               | Yes with VKA                            |

Abbreviations: AF, atrial fibrillation; ACS, acute coronary syndrome; ASA, aspirin; CLOPI, clopidogrel; DPT, dual-pathway treatment; Tritherapy, 2 antiplatelet drugs + 1 anticoagulant drug; VKA, vitamin K antagonist.

**Supplementary Table S2** Influence of different antithrombotic treatments on the risk of major bleeding events in patients with mild hemophilia

|                   | Control        | COCHE AT-       | COCHE AT+           | COCHE SAPT          | COCHE DAPT          | COCHE AC           | COCHE DPT           | COCHE TT          |
|-------------------|----------------|-----------------|---------------------|---------------------|---------------------|--------------------|---------------------|-------------------|
| Mean ABR (95% CI) | 0.044 (0-0.09) | 0.133 (0-0.328) | 0.361 (0.293-0.463) | 0.232 (0.177-0.286) | 0.517 (0.324-0.711) | 0.353 (0.01-0.606) | 1.143 (0.793-1.492) | 2 (0-7.141)       |
| n patients        | 48             | 6               | 48                  | 34                  | 12                  | 10                 | 2                   | 1                 |
| n months          | 822            | 90              | 732                 | 472                 | 116                 | 102                | 42                  | 6                 |
| Control           |                | 0.31            | 0.11                | 0.18                | 0.09                | 0.12               | 0.03                | 0.02              |
| (95% CI)          |                | (0.03-3.06)     | (0.03-0.36)         | (0.05-0.68)         | (0.02-0.36)         | (0.02-0.59)        | (0.007-0.16)        | (0.002-0.2)       |
| p                 |                | 0.3313          | <0.0001             | 0.0111              | 0.0013              | 0.0187             | 0.0001              | 0.0277            |
| COCHE AT-         |                |                 | 0.35                | 0.58                | 0.27                | 0.37               | 0.11                | 0.06              |
| (95% CI)          |                |                 | (0.05-2.59)         | (0.07-4.62)         | (0.03-2.37)         | (0.04-3.63)        | (0.01-0.99)         | (0.003-1.04)      |
| p                 |                |                 | 0.505               | 0.7069              | 0.4044              | 0.624              | 0.0353              | 0.1217            |
| COCHE AT+         |                |                 | 2.89                | 2.19 <sup>a</sup>   | 0.75 <sup>a</sup>   | 1.09 <sup>a</sup>  | 0.27 <sup>a</sup>   | 0.16 <sup>a</sup> |
| (95% CI)          |                |                 | (0.39-21.66)        | (0.89-5.34)         | (0.27-2.03)         | (0.32-3.7)         | (0.09-0.83)         | (0.02-1.4)        |
| p                 |                |                 | 0.505               | 0.0988              | 0.5754              | 1                  | 0.0379              | 0.1752            |

(Continued)

Supplementary Table S2 (Continued)

|            | Control  | COCHE AT-    | COCHE AT+         | COCHE SAPT   | COCHE DAPT   | COCHE AC     | COCHE DPT    | COCHE TT    |
|------------|----------|--------------|-------------------|--------------|--------------|--------------|--------------|-------------|
| COCHE SAPT | OR       | 1.73         | 0.46 <sup>a</sup> |              | 0.31         | 0.64         | 0.18         | 0.14        |
|            | (95% CI) | (0.22–13.83) | (0.19–1.12)       |              | (0.11–0.85)  | (0.17–2.41)  | (0.05–0.63)  | (0.02–1.3)  |
| COCHE DAPT | <i>p</i> | 0.7069       | 0.0988            |              | 0.0249       | 0.455        | 0.0161       | 0.1642      |
|            | OR       | 3.68         | 1.34 <sup>a</sup> | 3.24         |              | 1.36         | 0.39         | 0.21        |
| COCHE AC   | (95% CI) | (0.42–32.05) | (0.49–3.66)       | (1.18–8.9)   |              | (0.32–5.85)  | (0.1–1.54)   | (0.02–2.12) |
|            | <i>p</i> | 0.4044       | 0.5754            | 0.0249       |              | 0.7341       | 0.2297       | 0.2478      |
| COCHE DPT  | OR       | 2.7          | 0.92 <sup>a</sup> | 1.56         | 0.73         |              | 0.29         | 0.15        |
|            | (95% CI) | (0.28–26.41) | (0.27–3.14)       | (0.41–5.86)  | (0.17–3.15)  |              | (0.06–1.35)  | (0.01–1.73) |
| COCHE TT   | <i>p</i> | 0.624        | 1                 | 0.455        | 0.7341       |              | 0.194        | 0.207       |
|            | OR       | 9.37         | 3.68 <sup>a</sup> | 5.42         | 2.55         | 3.47         |              | 0.53        |
| COCHE SAPT | (95% CI) | (1.01–86.65) | (1.2–11.32)       | (1.59–18.41) | (0.65–9.97)  | (0.74–16.26) |              | (0.05–5.7)  |
|            | <i>p</i> | 0.0353       | 0.0379            | 0.0161       | 0.2297       | 0.194        |              | 0.5032      |
| COCHE DAPT | OR       | 17.8         | 6.37 <sup>a</sup> | 7.06         | 4.84         | 6.6          | 1.9          |             |
|            | (95% CI) | (0.96–328.5) | (0.72–56.8)       | (0.77–64.84) | (0.47–49.57) | (0.58–75.39) | (0.18–20.57) |             |
| COCHE AC   | <i>p</i> | 0.1217       | 0.1752            | 0.1642       | 0.2478       | 0.207        | 0.5032       |             |
|            | OR       | 0.0277       |                   |              |              |              |              |             |

Abbreviations: ABR, annualized bleeding rate; AC, anticoagulant drug alone; AT –, no antithrombotic treatment; AT +, antithrombotic treatment; CLOPI, clopidogrel; DAPT, dual antiplatelet treatment; DPT, dual-pathway treatment; SAPT, single antiplatelet treatment; TT, tritherapy with 2 antiplatelet drugs and 1 anticoagulant drug; VKA, vitamin K antagonist.

Note: Odds ratios were measured from row subgroups vs. column subgroups with the Fischer's exact test. Significance was set at  $p < 0.05$  with 95% CI.

<sup>a</sup>Subgroups with an AT were compared with all other subgroups with AT.

**Supplementary Table S3** Influence of antithrombotic monotherapies on the risk of major bleeding events in patients with mild hemophilia

|                   | Control        | VKA             | DOA       | ASA                 | CLOPI       |            |
|-------------------|----------------|-----------------|-----------|---------------------|-------------|------------|
| Mean ABR (95% CI) | 0.044 (0–0.09) | 0.545 (0–1.165) | 0         | 0.262 (0.092–0.432) | 0.2 (0–0.6) |            |
| <i>n</i> patients | 48             | 6               | 4         | 30                  | 4           |            |
| <i>n</i> months   | 822            | 66              | 36        | 412                 | 60          |            |
| Control           | OR             |                 | 0.07      | 0.3                 | 0.16        | 0.21       |
|                   | (95% CI)       |                 | 0.01–0.38 | 0.02–5.94           | 0.04–0.59   | 0.02–2.04  |
|                   | <i>p</i>       |                 | 0.0061    | 1                   | 0.0031      | 0.2387     |
| VKA               | OR             | 13.48           |           | 4.02                | 2.13        | 2.81       |
|                   | (95% CI)       | 2.66–68.17      |           | 0.2–80.15           | 0.56–8.09   | 0.28–27.78 |
|                   | <i>p</i>       | 0.0061          |           | 0.55                | 0.22        | 0.6207     |
| DOA               | OR             | 3.33            | 0.25      |                     | 0.58        | 0.54       |
|                   | (95% CI)       | 0.17–65.62      | 0.01–4.95 |                     | 0.03–10.21  | 0.02–13.71 |
|                   | <i>p</i>       | 1               | 0.55      |                     | 1           | 1          |
| ASA               | OR             | 6.32            | 0.47      | 1.72                |             | 1.32       |
|                   | (95% CI)       | 1.7–23.48       | 0.12–1.78 | 0.1–30.15           |             | 0.16–10.59 |
|                   | <i>p</i>       | 0.0031          | 0.22      | 1                   |             | 1          |
| CLOPI             | OR             | 4.8             | 0.36      | 1.84                | 0.76        |            |
|                   | (95% CI)       | 0.49–46–85      | 0.04–3.52 | 0.07–46.42          | 0.09–6.1    |            |
|                   | <i>p</i>       | 0.2387          | 0.6207    | 1                   | 1           |            |

Abbreviations: ABR, annualized bleeding rate; ASA aspirin alone; CI, confidence interval; CLOPI, clopidogrel alone; DOA, direct oral anticoagulant alone; OR, odds ratio; VKA, vitamin K antagonist alone.

Note: Odds ratios were measured from row subgroups vs. column subgroups with the Fischer's exact test. Significance was set at  $p < 0.05$  with 95% CI.

**Supplementary Table S4** Summary of risk factors for major bleeding in antithrombotic-treated patients with hemophilia

| Risk factor for major bleedings  | Comments                                                                                                                                 |
|----------------------------------|------------------------------------------------------------------------------------------------------------------------------------------|
| Severity of hemophilia           | Mean ABR is directly correlated with basal clotting factor levels up to 20%                                                              |
| Clotting factor treatment        | Prophylaxis in severe and moderate hemophilia attenuates mean ABR compared with controls                                                 |
| Type of antithrombotic treatment | Mean ABR is for DPT > DAPT > SAPT (with insignificantly, DAPT ≥ AC ≥ SAP). Antiplatelet drugs can promote GIB                            |
| HAS-BLED score ≥ 3               | Other patient-related parameters than hemophilia can promote bleeding (e.g., arterial hypertension, age > 65 years old or liver disease) |

Abbreviations: ABR, annualized bleeding rate; AC, anticoagulant drug alone; DAPT, dual antiplatelet therapy; DPT, dual pathway therapy; GIB, gastrointestinal bleeding; HAS-BLED, hypertension, abnormal liver or renal function, stroke, bleeding history, labile INR, elderly (> 65 years old) and drugs/alcohol/tobacco use; SAPT, single antiplatelet therapy.
